# Supplementary material for: Identification of Potential Hazards Associated with South Korean Prawns and Monitoring Results Targeting Fishing Bait
Source: MDPI journal article supplement (doi:10.3390/pathogens12101228), 2023-10-10
Supplement: s1 [file s1]

**Table S1.** Primers and PCR conditions used in this study.

1

| Pathogen<br>(or Disease)                     | Primers            | Sequences (5'-3')                 | Size<br>(bp) | Conditions                                                                                 | Reference |
|----------------------------------------------|--------------------|-----------------------------------|--------------|--------------------------------------------------------------------------------------------|-----------|
| Covert mortality<br>nodavirus (CMNV)         | CMNV-7F1           | AAA TAC GGC GAT GAC G             | 618          | 94 °C for 4 min,<br>(94 °C for 30 s,<br>45 °C for 30 s,<br>72 °C for 40 s)<br>× 35 cycles, | [14]      |
|                                              | Step 1<br>CMNV-7R1 | ACG AAG TGC CCA CAG AC            |              | 72 °C for 7 min                                                                            |           |
|                                              | CMNV-7F2           | CAC AAC CGA GTC AAA CC            | 165          | 94 °C for 4 min,<br>(94 °C for 20 s,<br>50 °C for 20 s,<br>72 °C for 20 s)<br>× 30 cycles, |           |
|                                              | Step 2<br>CMNV-7R2 | GCG TAA ACA GCG AAG G             |              | 72 °C for 7 min                                                                            |           |
| Decapod iridescent<br>virus 1 (DIV1)         | SHIV-F1            | GGG CGG GAG ATG GTG TTA GAT       | 457          | 95 °C for 3 min,<br>(95 °C for 30 s,<br>59 °C for 30 s,<br>72 °C for 30 s)<br>× 35 cycles, | [15]      |
|                                              | Step 1<br>SHIV-R1  | TCG TTT CGG TAC GAA GAT GTA       |              | 72 °C for 2 min                                                                            |           |
|                                              | SHIV-F2            | CGG GAA ACG ATT CGT ATT GGG       | 129          | 95 °C for 3 min,<br>(95 °C for 30 s,<br>59 °C for 30 s,<br>72 °C for 20 s)<br>× 35 cycles, |           |
|                                              | Step 2<br>SHIV-R2  | TTG CTT GAT CGG CAT CCT TGA       |              | 72 °C for 2 min                                                                            |           |
| <i>Enterocytozoon<br/>hepatopenaei</i> (EHP) | SWP_1F             | TTG CAG AGT GTT GTT AAG GGT TT    | 514          | 95 °C for 5 min,<br>(95 °C for 30 s,<br>58 °C for 30 s,<br>68 °C for 45 s)<br>× 30 cycles, | [41]      |
|                                              | Step 1<br>SWP_1R   | CAC GAT GTG TCT TTG CAA TTT TC    |              | 68 °C for 5 min                                                                            |           |
|                                              | SWP_2F             | TTG GCG GCA CAA TTC TCA AAC A     | 148          | 95 °C for 5 min,<br>(95 °C for 30 s,<br>64 °C for 30 s,<br>68 °C for 20 s)<br>× 20 cycles, |           |
|                                              | Step 2<br>SWP_2R   | GCT GTT TGT CTC CAA CTG TAT TTG A |              | 68 °C for 5 min                                                                            |           |
|                                              | IHHNV389F          | CGG AAC ACA ACC CGA CTT TA        | 389          |                                                                                            | [42]      |

|                                                                 |        |            |                               |     |                                                                                                                                     |      |
|-----------------------------------------------------------------|--------|------------|-------------------------------|-----|-------------------------------------------------------------------------------------------------------------------------------------|------|
| Infectious hypodermal and haematopoietic necrosis virus (IHHNV) |        | IHHNV389 R | GGC CAA GAC CAA AAT ACG AA    |     | 94 °C for 5 min,<br>(94 °C for 30 s,<br>60 °C for 30 s,<br>72 °C for 30 s)<br>× 35 cycles,<br>72 °C for 7 min                       |      |
|                                                                 |        | 4587F      | CGA CGC TGC TAA CCA TAC AA    |     | 60 °C for 30 min,<br>95 °C for 2 min,<br>(95 °C for 45 sec,<br>60 °C for 45 sec)<br>× 39 cycles,<br>60 °C for 7 min                 |      |
|                                                                 | Step 1 | 4914R      | ACT CGG CTG TTC GAT CAA GT    | 328 | 95 °C for 2 min,<br>(95 °C for 30 s,<br>65 °C for 30 s,<br>72 °C for 30 s)<br>× 39 cycles,<br>72 °C for 2 min                       | [43] |
| Infectious myonecrosis virus (IMNV)                             |        | 4725NF     | GGC ACA TGC TCA GAG ACA       |     |                                                                                                                                     |      |
|                                                                 | Step 2 | 4863NR     | AGC GCT GAG TCC AGT CTT G     | 139 |                                                                                                                                     |      |
|                                                                 |        | 20AF       | TTG CCT TCT CCC GAG TGG TC    |     | 94 °C for 5 min,<br>(94 °C for 1 min,<br>60 °C for 1 min,<br>72 °C for 1 min)<br>× 35 cycles,<br>72 °C for 10 min                   |      |
|                                                                 | Step 1 | 20AR       | CCG GCT GAG GTA GCT GCT TG    | 200 | 42 °C for 1 h,<br>94 °C for 5 min,<br>(94 °C for 1 min,<br>60 °C for 1 min,<br>72 °C for 1 min)<br>× 35 cycles,<br>72 °C for 10 min | [12] |
| Laem-Singh virus (LSNV)                                         |        | LSNVnF     | GCG CAA GAG TTC TCA GGC TT    |     |                                                                                                                                     |      |
|                                                                 | Step 2 | LSNVnR     | ATC ACC GCA GGC TAA TAT AG    | 140 |                                                                                                                                     | [13] |
|                                                                 |        | NHPF2      | CGT TGG AGG TTC GTC CTT CAG T |     | 95 °C for 5 min,<br>(95 °C for 30 s,<br>60 °C for 30 s,<br>72 °C for 30 s)<br>× 35 cycles,<br>60 °C for 1 min,<br>72 for 2 min      |      |
| Necrotising hepatopancreatitis (NHP)                            |        | NHPR2      | GCC ATG AGG ACC TGA CAT CAT C | 379 |                                                                                                                                     | [44] |
| Taura syndrome virus (TSV)                                      |        | 9992F      | AAG TAG ACA GCC GCG CTT       |     | 60 °C for 30 min,<br>94 °C for 2 min,                                                                                               |      |
|                                                                 |        | 9195R      | TCA ATG AGA GCT TGG TCC       | 231 |                                                                                                                                     | [30] |

|                                                                                               |        |         |                                        |                                                                                                                                                          |      |
|-----------------------------------------------------------------------------------------------|--------|---------|----------------------------------------|----------------------------------------------------------------------------------------------------------------------------------------------------------|------|
|                                                                                               |        |         |                                        | (94 °C for 45 s,<br>60 °C for 45 s)<br>× 40 cycles,<br>60 °C for 7 min                                                                                   | [45] |
| <i>Vibrio<br/>parahaemolyticus</i><br>containing Pir toxins<br>( <i>Vp</i> <sub>AHPND</sub> ) | Step 1 | AP4-F1  | ATG AGT AAC AAT ATA AAA CAT GAA<br>AC  | 94°C for 2 min,<br>(94°C for 30 s,<br>55°C for 30 s,<br>72°C for 90 s)<br>× 30 cycles,<br>72°C for 2 min                                                 |      |
|                                                                                               |        | AP4-R1  | ACG ATT TCG ACG TTC CCC AA             | 1269                                                                                                                                                     |      |
|                                                                                               |        | AP4-F2  | TTG AGA ATA CGG GAC GTG GG             | 94 °C for 2 min,<br>(94 °C for 20 s,<br>55 °C for 20 s,<br>72 °C for 20 s)<br>× 25 cycles                                                                |      |
|                                                                                               | Step 2 | AP4-R2  | GTT AGT CAT GTG AGC ACC TTC            | 230                                                                                                                                                      |      |
|                                                                                               |        |         |                                        |                                                                                                                                                          |      |
| White spot<br>syndrome virus<br>(WSSV)                                                        | Step 1 | 146F1   | ACT ACT AAC TTC AGC CTA TCT AG         | 94 °C for 4 min,<br>55 °C for 1 min,<br>72 °C for 2 min,<br>(94 °C for 1 min,<br>55 °C for 1 min,<br>72 °C for 2 min)<br>× 39 cycles,<br>72 °C for 5 min | [46] |
|                                                                                               |        | 146R1   | TAA TGC GGG TGT AAT GTT CTT ACG<br>A   | 1447                                                                                                                                                     |      |
|                                                                                               |        | 146F2   | GTA ACT GCC CCT TCC ATC TCC A          | 941                                                                                                                                                      |      |
|                                                                                               | Step 2 | 146R2   | TAC GGC AGC TGC TGC ACC TTG T          | 941                                                                                                                                                      |      |
|                                                                                               |        |         |                                        |                                                                                                                                                          |      |
| White tail disease<br>(WTD)                                                                   | Step 1 | MrNV-F  | GAT ACA GAT CCA CTA GAT GAC C          | 681                                                                                                                                                      | [47] |
|                                                                                               |        | MrNV-R  | GAC GAT AGC TCT GAT AAT CC             | 500                                                                                                                                                      |      |
|                                                                                               |        | XSV-F   | GGA GAA CCA TGA GAT CAC G              | 500                                                                                                                                                      |      |
|                                                                                               | Step 2 | XSV-R   | CTG CTC ATT ACT GTT CGG AGT C          | 500                                                                                                                                                      |      |
|                                                                                               |        |         |                                        |                                                                                                                                                          |      |
| Yellow head virus<br>genotype 1 (YHV1)                                                        | Step 1 | YC-F1ab | ATC GTC GTC AGY TAY CGY AAY ACY<br>GC  | 358                                                                                                                                                      | [48] |
|                                                                                               |        | YC-R1ab | TCT KCR YGT GTG AAC ACY TTC TTR<br>GC  | 146                                                                                                                                                      |      |
|                                                                                               |        | YC-F2ab | CGC TTY CAR TGT ATC TGY ATG CAC<br>CA  | 146                                                                                                                                                      |      |
|                                                                                               | Step 2 | YC-R2ab | RTC DGT GTA CAT RTT DGA GAG TTT<br>RTT | 146                                                                                                                                                      |      |
|                                                                                               |        |         |                                        |                                                                                                                                                          |      |

---

72 °C for 45 s)

× 35 cycles,

72 °C for 7 min

---

**Table S2.** Results of the hazard identification of fishing baits.

3

| Pathogen<br>(Disease)                                                                                                                                                | Susceptible<br>species                                                                                                                                                                                                        | Reportable or<br>listed disease<br>(Yes/No) |                | Geographic<br>distribution                                                                                                          |                | Sub-<br>types | Zoonotic<br>disease<br>(Yes/No) | Entry<br>may<br>cause an<br>outbreak<br>and<br>increase<br>domestic<br>damage<br>(Yes/No) | Establishment<br>and<br>implementation<br>of a monitoring<br>plan at the<br>national level<br>(Yes/No) | Considered a<br>hazard in this<br>study?<br>(Yes/No:<br>Reasons)                                                                                                                                                                                                                                                                                                                              | References |
|----------------------------------------------------------------------------------------------------------------------------------------------------------------------|-------------------------------------------------------------------------------------------------------------------------------------------------------------------------------------------------------------------------------|---------------------------------------------|----------------|-------------------------------------------------------------------------------------------------------------------------------------|----------------|---------------|---------------------------------|-------------------------------------------------------------------------------------------|--------------------------------------------------------------------------------------------------------|-----------------------------------------------------------------------------------------------------------------------------------------------------------------------------------------------------------------------------------------------------------------------------------------------------------------------------------------------------------------------------------------------|------------|
|                                                                                                                                                                      |                                                                                                                                                                                                                               | WOAH                                        | South<br>Korea | Others                                                                                                                              | South<br>Korea |               |                                 |                                                                                           |                                                                                                        |                                                                                                                                                                                                                                                                                                                                                                                               |            |
| <i>Vibrio</i><br><i>parahaemolyticus</i><br>strains containing<br>Pir toxins <i>Vp</i> <sub>AHPND</sub><br>(acute<br>hepatopancreatic<br>necrosis disease,<br>AHPND) | <i>Penaeus</i><br><i>chinensis</i><br><i>Penaeus</i><br><i>japonicus</i><br><i>Penaeus</i><br><i>monodon</i><br><i>Penaeus</i><br><i>semisulcatus</i><br><i>Penaeus</i><br><i>vannamei</i><br>(various<br>penaeid<br>species) | Yes                                         | Yes            | Bangladesh<br>China<br>Costa Rica<br>Egypt<br>Malaysia<br>Mexico<br>Myanmar<br>Peru<br>Philippines<br>Taiwan<br>Thailand<br>Vietnam | Yes            | -             | No                              | Yes                                                                                       | Yes                                                                                                    | Yes: AHPND is<br>listed by the<br>WOAH and is<br>associated with<br>significant<br>losses in prawn<br>farming<br>environment<br>and is<br>widespread in<br>countries likely<br>to export large<br>quantities of<br>prawns to<br>Korea.<br>AHPND is also<br>included on the<br><i>List of diseases in</i><br><i>Korea</i> , and the<br><i>List of diseases in</i><br><i>the Asia-Pacific</i> . | [49–56]    |

---

AHPND means infection with strains of *Vibrio parahaemolyticus* ( $Vp_{\text{AHPND}}$ ) that contain a ~70 kbp plasmid with genes that encode homologues of the *Photorhabdus* insect-related (Pir) toxins, PirA and PirB. Although there are reports of the isolation of other *Vibrio* sp. from clinical cases of AHPND, only  $Vp_{\text{AHPND}}$  has been demonstrated to cause AHPND. This pathogenic agent complies with the criteria described in the *WOAH Aquatic Animal Health*

---

|                                                                                     |                                  |     |     |          |    |    |    |     |     | Code Article<br>2.1.2. Hazard<br>Identification<br>and will be<br>retained for<br>risk<br>assessment.                                                                                                                                                                                                                                                                                                                                                                      |
|-------------------------------------------------------------------------------------|----------------------------------|-----|-----|----------|----|----|----|-----|-----|----------------------------------------------------------------------------------------------------------------------------------------------------------------------------------------------------------------------------------------------------------------------------------------------------------------------------------------------------------------------------------------------------------------------------------------------------------------------------|
| Candidatus<br>Hepatobacter<br>penaei<br>(Necrotising<br>hepatopancreatitis,<br>NHP) | <i>Penaeus</i>                   |     |     |          |    |    |    |     |     | Yes: NHP is<br>WOAH listed<br>and associated<br>with significant<br>losses in prawn<br>farming<br>environment<br>and is<br>widespread<br>throughout the<br>world.<br>NHP is<br>included on the<br><i>List of diseases in<br/>Korea and the<br/>List of diseases in<br/>the Asia-Pacific</i> .<br>This pathogenic<br>agent complies<br>with the criteria<br>described in the<br>WOAH <i>Aquatic<br/>Animal Health<br/>Code Article<br/>2.1.2. Hazard<br/>Identification</i> |
|                                                                                     | <i>aztecus</i>                   |     |     |          |    |    |    |     |     |                                                                                                                                                                                                                                                                                                                                                                                                                                                                            |
|                                                                                     | <i>Penaeus</i>                   |     |     |          |    |    |    |     |     |                                                                                                                                                                                                                                                                                                                                                                                                                                                                            |
|                                                                                     | <i>duorarum</i>                  |     |     |          |    |    |    |     |     |                                                                                                                                                                                                                                                                                                                                                                                                                                                                            |
|                                                                                     | <i>Penaeus</i>                   |     |     |          |    |    |    |     |     |                                                                                                                                                                                                                                                                                                                                                                                                                                                                            |
|                                                                                     | <i>marginatus</i>                |     |     |          |    |    |    |     |     |                                                                                                                                                                                                                                                                                                                                                                                                                                                                            |
|                                                                                     | <i>Penaeus</i>                   |     |     |          |    |    |    |     |     |                                                                                                                                                                                                                                                                                                                                                                                                                                                                            |
|                                                                                     | <i>merguiensis</i>               |     |     |          |    |    |    |     |     |                                                                                                                                                                                                                                                                                                                                                                                                                                                                            |
|                                                                                     | <i>Penaeus</i>                   |     |     |          |    |    |    |     |     |                                                                                                                                                                                                                                                                                                                                                                                                                                                                            |
|                                                                                     | <i>setiferus</i>                 |     |     |          |    |    |    |     |     |                                                                                                                                                                                                                                                                                                                                                                                                                                                                            |
|                                                                                     | <i>Penaeus</i>                   |     |     | Americas |    |    |    |     |     |                                                                                                                                                                                                                                                                                                                                                                                                                                                                            |
|                                                                                     | <i>stylirostris</i>              |     |     | Malaysia |    |    |    |     |     |                                                                                                                                                                                                                                                                                                                                                                                                                                                                            |
|                                                                                     | <i>Penaeus</i>                   | Yes | Yes | Thailand | No | No | No | Yes | Yes |                                                                                                                                                                                                                                                                                                                                                                                                                                                                            |
|                                                                                     | <i>vannamei</i>                  |     |     | USA      |    |    |    |     |     |                                                                                                                                                                                                                                                                                                                                                                                                                                                                            |
|                                                                                     | (various<br>penaeid<br>species)  |     |     | Vietnam  |    |    |    |     |     |                                                                                                                                                                                                                                                                                                                                                                                                                                                                            |
|                                                                                     | <i>Penaeus</i>                   |     |     |          |    |    |    |     |     |                                                                                                                                                                                                                                                                                                                                                                                                                                                                            |
|                                                                                     | <i>monodon</i>                   |     |     |          |    |    |    |     |     |                                                                                                                                                                                                                                                                                                                                                                                                                                                                            |
|                                                                                     | (experimental<br>infection only) |     |     |          |    |    |    |     |     |                                                                                                                                                                                                                                                                                                                                                                                                                                                                            |
|                                                                                     | <i>Homarus</i>                   |     |     |          |    |    |    |     |     |                                                                                                                                                                                                                                                                                                                                                                                                                                                                            |
|                                                                                     | <i>americanus</i>                |     |     |          |    |    |    |     |     |                                                                                                                                                                                                                                                                                                                                                                                                                                                                            |
|                                                                                     | (PCR result<br>only)             |     |     |          |    |    |    |     |     |                                                                                                                                                                                                                                                                                                                                                                                                                                                                            |

[57]

|                                          |                                                                                                                                        |    |     |                                         |     |    |    |           |    |                                                                                                                                                                                                                                                                                                                                                           |            |
|------------------------------------------|----------------------------------------------------------------------------------------------------------------------------------------|----|-----|-----------------------------------------|-----|----|----|-----------|----|-----------------------------------------------------------------------------------------------------------------------------------------------------------------------------------------------------------------------------------------------------------------------------------------------------------------------------------------------------------|------------|
|                                          |                                                                                                                                        |    |     |                                         |     |    |    |           |    | and will be retained for risk assessment.                                                                                                                                                                                                                                                                                                                 |            |
|                                          |                                                                                                                                        |    |     |                                         |     |    |    |           |    | Yes: EHP is associated with significant disease in Asia and is included on the <i>List of diseases in Korea</i> and <i>List of diseases in the Asia-Pacific</i> . This pathogenic agent complies with the criteria described in the <i>WOAH Aquatic Animal Health Code Article 2.1.2. Hazard Identification</i> and will be retained for risk assessment. | [58–65]    |
| <i>Enterocytozoon hepatopenaei</i> (EHP) | <i>Penaeus japonicus</i><br><i>Penaeus monodon</i><br><i>Penaeus stylirostris</i><br><i>Penaeus vannamei</i> (various penaeid species) | No | Yes | Asia<br>Venezuela                       | Yes | No | No | Yes       |    |                                                                                                                                                                                                                                                                                                                                                           |            |
| Covert mortality nodavirus (CMNV)        | <i>Macrobrachium rosenbergii</i><br><i>Penaeus chinensis</i>                                                                           | No | No  | China<br>Ecuador<br>Thailand<br>Vietnam | No  | No | No | Uncertain | No | Yes: CMNV has caused serious losses in China and cumulative mortalities of                                                                                                                                                                                                                                                                                | [14,66–68] |



|                                                                                                |                                                                                                                     |     |     |                           |    |    |    |     |     |     |                                                                                                                                                                                                                                                                                                                                                                                                    |            |
|------------------------------------------------------------------------------------------------|---------------------------------------------------------------------------------------------------------------------|-----|-----|---------------------------|----|----|----|-----|-----|-----|----------------------------------------------------------------------------------------------------------------------------------------------------------------------------------------------------------------------------------------------------------------------------------------------------------------------------------------------------------------------------------------------------|------------|
|                                                                                                |                                                                                                                     |     |     |                           |    |    |    |     |     |     | <p>up to 80-90% of <i>Penaeus vannamei</i> in culture.</p> <p>CMNV is not included on the <i>List of diseases in Korea</i>.</p> <p>CMNV is included in the <i>List of Diseases in the Asia-Pacific</i>.</p> <p>This pathogenic agent complies with the criteria described in the <i>WOAH Aquatic Animal Health Code 2.1.2. Hazard Identification</i> and will be retained for risk assessment.</p> |            |
| Decapod iridescent virus 1 (DIV1) or <i>Cherax quadricarinatus</i> iridovirus (CQIV) or Shrimp | <p><i>Cherax quadricarinatus</i></p> <p><i>Macrobrachium nipponense</i></p> <p><i>Macrobrachium rosenbergii</i></p> | Yes | Yes | China Indian Ocean Taiwan | No | No | No | Yes | Yes | Yes | <p>Yes: the National Fishery Products Quality Management Service (NFQS)</p>                                                                                                                                                                                                                                                                                                                        | [15,69–76] |

---

|                      |                    |                  |
|----------------------|--------------------|------------------|
| hemocyte             | <i>Penaeus</i>     | notes that       |
| iridescent virus     | <i>chinensis</i>   | although there   |
| (SHIV)               | <i>Penaeus</i>     | is limited       |
|                      | <i>japonicus</i>   | information      |
|                      | <i>Penaeus</i>     | regarding        |
|                      | <i>monodon</i>     | DIV1, it is      |
|                      | <i>Penaeus</i>     | considered a     |
|                      | <i>vannamei</i>    | serious          |
|                      | <i>Procambarus</i> | emerging         |
|                      | <i>clarkii...</i>  | disease in       |
|                      | (various           | aquaculture in   |
| penaeid and          |                    | China and        |
| caridean             |                    | appears to be    |
| species)             |                    | spreading        |
| <i>Cladocera</i> sp. |                    | throughout the   |
| Polychaetes          |                    | surroundings     |
| (aquatic             |                    | of farming       |
| animals)             |                    | areas in China - |
| <i>Exopalaemon</i>   |                    | large            |
| <i>carinicauda</i>   |                    | volumes of       |
| <i>Pachygrapsus</i>  |                    | imported         |
| <i>crassipes</i>     |                    | prawns are       |
| <i>Eriocheir</i>     |                    | sourced from     |
| <i>sinensis</i>      |                    | areas that may   |
| (experimental        |                    | be affected by   |
| infection only)      |                    | DIV1.            |
|                      |                    | Recent reports   |
|                      |                    | indicate it may  |
|                      |                    | be present in    |
|                      |                    | Thailand.        |
|                      |                    | Complete         |
|                      |                    | genome           |
|                      |                    | sequencing has   |

---

---

revealed that CQIV and SHIV are different strains or genotypes of the same virus. The genome of SHIV was shown to be 99% identical to the genome of CQIV. Recently, SHIV and CQIV were formally classified by the International Committee on Taxonomy of Viruses (ICTV) under the name Decapod iridescent virus 1 (DIV1) in the family Iridoviridae (ICTV, 2018). DIV1 is included in *the List of diseases in the Asia-Pacific*, and listed as a

---

|                                                                 |                                                                                                                                                                                                                                             |     |     |                                                                 |     |                  |    |     |     |                                                                                                         |                                                                                                                                                                                                                                                                                  |
|-----------------------------------------------------------------|---------------------------------------------------------------------------------------------------------------------------------------------------------------------------------------------------------------------------------------------|-----|-----|-----------------------------------------------------------------|-----|------------------|----|-----|-----|---------------------------------------------------------------------------------------------------------|----------------------------------------------------------------------------------------------------------------------------------------------------------------------------------------------------------------------------------------------------------------------------------|
|                                                                 |                                                                                                                                                                                                                                             |     |     |                                                                 |     |                  |    |     |     |                                                                                                         | <p>disease notifiable to the WOA and in the <i>List of diseases in Korea</i>.</p> <p>This pathogenic agent complies with the criteria described in the <i>WOAH Aquatic Animal Health Code Article 2.1.2. Hazard Identification</i> and will be retained for risk assessment.</p> |
| Infectious hypodermal and haematopoietic necrosis virus (IHHNV) | <p><i>Macrobrachium rosenbergii</i></p> <p><i>Penaeus californiensis</i></p> <p><i>Penaeus monodon</i></p> <p><i>Penaeus setiferus</i></p> <p><i>Penaeus stylirostris</i></p> <p><i>Penaeus vannamei...</i></p> <p>(various penaeid and</p> | Yes | Yes | <p>Africa</p> <p>Asia</p> <p>America</p> <p>Pacific islands</p> | Yes | Multiple strains | No | Yes | Yes | <p>Yes: is present in Korea. IHHNV is listed by WOA, is listed on <i>List of diseases in Korea</i>.</p> | [77–80]                                                                                                                                                                                                                                                                          |

[illegible]

|                                                                                                             |                                                                                                                                                                 |    |    |                                                                                            |    |    |    |     |    |                                                                                                                                                                                                                                                                                                                                                                                                                                               |            |
|-------------------------------------------------------------------------------------------------------------|-----------------------------------------------------------------------------------------------------------------------------------------------------------------|----|----|--------------------------------------------------------------------------------------------|----|----|----|-----|----|-----------------------------------------------------------------------------------------------------------------------------------------------------------------------------------------------------------------------------------------------------------------------------------------------------------------------------------------------------------------------------------------------------------------------------------------------|------------|
| Laem-Singh virus (LSNV)<br>(Wenzhou shrimp virus genotype 9, WZSV9)<br>(Monodon slow growth syndrome, MSGS) | <i>Penaeus<br/>dobsoni</i><br><i>Penaeus<br/>merguiensis</i><br><i>Penaeus<br/>monodon</i><br><i>Penaeus<br/>vannamei...</i><br>(various<br>penaeid<br>species) | No | No | China<br>India<br>Indonesia<br>Malaysia<br>Philippines<br>Sri Lanka<br>Thailand<br>Vietnam | No | No | No | Yes | No | Yes: It has recently been determined that LSNV and WZSV9 are different isolates of the same virus species. Although there is limited information regarding LSNV and its role in MSGS, large volume of imported prawns are sourced from countries that may be affected by MSGS. LSNV will be considered in context with MSGS. This pathogenic agent complies with the criteria described in the <i>WOAH Aquatic Animal Health Code Article</i> | [13,84–88] |
|-------------------------------------------------------------------------------------------------------------|-----------------------------------------------------------------------------------------------------------------------------------------------------------------|----|----|--------------------------------------------------------------------------------------------|----|----|----|-----|----|-----------------------------------------------------------------------------------------------------------------------------------------------------------------------------------------------------------------------------------------------------------------------------------------------------------------------------------------------------------------------------------------------------------------------------------------------|------------|

|                            |                                                                |     |     |                             |     |     |    |     |     |                                                                                                                                                                                                                                                                                                                                                                                                 |
|----------------------------|----------------------------------------------------------------|-----|-----|-----------------------------|-----|-----|----|-----|-----|-------------------------------------------------------------------------------------------------------------------------------------------------------------------------------------------------------------------------------------------------------------------------------------------------------------------------------------------------------------------------------------------------|
|                            |                                                                |     |     |                             |     |     |    |     |     | 2.1.2. Hazard Identification and will be retained for risk assessment.                                                                                                                                                                                                                                                                                                                          |
| Taura syndrome virus (TSV) | <i>Penaeus aztecus</i>                                         |     |     |                             |     |     |    |     |     | Yes: TSV is WOAHA Listed and is associated with significant losses in prawn farming environment and is widespread throughout the world. TSV is included on the <i>List of diseases in Korea</i> , and the <i>List of diseases in the Asia-Pacific</i> . This pathogenic agent complies with the criteria described in the WOAHA Aquatic Animal Health Code Article 2.1.2. Hazard Identification |
|                            | <i>Penaeus ensis</i>                                           |     |     |                             |     |     |    |     |     |                                                                                                                                                                                                                                                                                                                                                                                                 |
|                            | <i>Penaeus indicus</i>                                         |     |     |                             |     |     |    |     |     |                                                                                                                                                                                                                                                                                                                                                                                                 |
|                            | <i>Penaeus monodon</i>                                         |     |     | Americas (including Hawaii) |     |     |    |     |     |                                                                                                                                                                                                                                                                                                                                                                                                 |
|                            | <i>Penaeus setiferus</i>                                       |     |     | China                       |     |     |    |     |     |                                                                                                                                                                                                                                                                                                                                                                                                 |
|                            | <i>Penaeus stylirostris</i>                                    |     |     | East Africa                 |     |     |    |     |     |                                                                                                                                                                                                                                                                                                                                                                                                 |
|                            | <i>Penaeus vannamei</i> ...                                    | Yes | Yes | Indonesia                   | Yes | Yes | No | Yes | Yes |                                                                                                                                                                                                                                                                                                                                                                                                 |
|                            | (various penaeid and caridean species)                         |     |     | Malaysia                    |     |     |    |     |     |                                                                                                                                                                                                                                                                                                                                                                                                 |
|                            | <i>Penaeus merguensis</i>                                      |     |     | Middle East                 |     |     |    |     |     |                                                                                                                                                                                                                                                                                                                                                                                                 |
|                            | <i>Macrobrachium rosenbergii</i> (experimental infection only) |     |     | Myanmar                     |     |     |    |     |     |                                                                                                                                                                                                                                                                                                                                                                                                 |
|                            |                                                                |     |     | Taiwan                      |     |     |    |     |     |                                                                                                                                                                                                                                                                                                                                                                                                 |
|                            |                                                                |     |     | Thailand                    |     |     |    |     |     |                                                                                                                                                                                                                                                                                                                                                                                                 |
|                            |                                                                |     |     | Vietnam                     |     |     |    |     |     |                                                                                                                                                                                                                                                                                                                                                                                                 |

|                                  |                                                                                                                         |     |     |                                                |     |    |    |     |     |                                                                                                                                                                                                                                                                                                                                                                                                                              |
|----------------------------------|-------------------------------------------------------------------------------------------------------------------------|-----|-----|------------------------------------------------|-----|----|----|-----|-----|------------------------------------------------------------------------------------------------------------------------------------------------------------------------------------------------------------------------------------------------------------------------------------------------------------------------------------------------------------------------------------------------------------------------------|
|                                  |                                                                                                                         |     |     |                                                |     |    |    |     |     | and will be retained for risk assessment.                                                                                                                                                                                                                                                                                                                                                                                    |
| White spot syndrome virus (WSSV) | All decapod Crustaceans from marine, brackish or freshwater sources challenged with infection with WSSV are susceptible | Yes | Yes | Americas<br>Asia<br>East Africa<br>Middle East | Yes | No | No | Yes | Yes | Yes: WSSV is WOAHA listed and associated with significant losses in prawn farming environment and is widespread throughout the world. WSSV is included on the <i>List of diseases in Korea</i> , and the <i>List of diseases in the Asia-Pacific</i> . Korea is managing an outbreak of WSSV. This pathogenic agent complies with the criteria described in the <i>WOAH Aquatic Animal Health Code Article 2.1.2. Hazard</i> |

[91–96]



|                                                                                                                                      |                                        |     |           |                    |     |               |    |     |     | Identification and will be retained for risk assessment.                                                                                                                   |           |
|--------------------------------------------------------------------------------------------------------------------------------------|----------------------------------------|-----|-----------|--------------------|-----|---------------|----|-----|-----|----------------------------------------------------------------------------------------------------------------------------------------------------------------------------|-----------|
| Macrobrachium rosenbergii nodavirus (MrNV) and extra small virus (XSV) or Macrobrachium muscle virus (MMV) (White tail disease, WTD) | Macrobrachium rosenbergii              |     |           | China              |     |               |    |     |     | Yes: present in Korea but subject to control or eradication. WTD is included on the List of diseases in Korea, WOA, and the List of diseases in the Asia-Pacific.          | [97–103]  |
|                                                                                                                                      | Penaeus indicus                        |     |           | Dominican Republic |     |               |    |     |     |                                                                                                                                                                            |           |
|                                                                                                                                      | Penaeus monodon                        |     |           | French West Indies |     |               |    |     |     |                                                                                                                                                                            |           |
|                                                                                                                                      | Penaeus japonicus                      | Yes | Yes       | India              | Yes | No            | No | Yes | Yes |                                                                                                                                                                            |           |
|                                                                                                                                      | Penaeus vannamei...                    |     |           | Indonesia          |     |               |    |     |     |                                                                                                                                                                            |           |
|                                                                                                                                      | (various penaeid and caridean species) |     |           | Malaysia           |     |               |    |     |     |                                                                                                                                                                            |           |
|                                                                                                                                      |                                        |     |           | Myanmar            |     |               |    |     |     |                                                                                                                                                                            |           |
|                                                                                                                                      |                                        |     |           | Taiwan             |     |               |    |     |     |                                                                                                                                                                            |           |
|                                                                                                                                      |                                        |     |           | Thailand           |     |               |    |     |     |                                                                                                                                                                            |           |
|                                                                                                                                      |                                        |     |           | Vietnam            |     |               |    |     |     |                                                                                                                                                                            |           |
| Yellow head virus genotype 1 (YHV1)                                                                                                  | Penaeus monodon                        |     |           | Egypt              |     |               |    |     |     | Yes: YHV1 is WOA listed and has been found in many commercially important wild and cultured species throughout the world at relatively high prevalence and is increasingly | [104–106] |
|                                                                                                                                      | Penaeus stylirostris                   |     |           | Indonesia          |     |               |    |     |     |                                                                                                                                                                            |           |
|                                                                                                                                      | Penaeus vannamei                       |     |           | Malaysia           |     |               |    |     |     |                                                                                                                                                                            |           |
|                                                                                                                                      | (various penaeid and caridean species) | Yes | Yes       | Mexico             |     |               |    |     |     |                                                                                                                                                                            |           |
|                                                                                                                                      |                                        |     |           | Myanmar            | Yes | Genotype 1-10 | No | Yes | Yes |                                                                                                                                                                            |           |
|                                                                                                                                      | Palaemonetes pugio                     |     |           | Philippines        |     |               |    |     |     |                                                                                                                                                                            |           |
|                                                                                                                                      |                                        |     | Sri Lanka |                    |     |               |    |     |     |                                                                                                                                                                            |           |
|                                                                                                                                      |                                        |     | Taiwan    |                    |     |               |    |     |     |                                                                                                                                                                            |           |
|                                                                                                                                      |                                        |     | Thailand  |                    |     |               |    |     |     |                                                                                                                                                                            |           |

|                                                             |                                                                                                                                                                                                                                                                                                                                                                                 |
|-------------------------------------------------------------|---------------------------------------------------------------------------------------------------------------------------------------------------------------------------------------------------------------------------------------------------------------------------------------------------------------------------------------------------------------------------------|
| <i>Metapenaeus affinis</i><br>(experimental infection only) | being associated with co-infections and stunted growth. Infection with YHV1 is included on the <i>List of diseases in Korea</i> , and the <i>List of diseases in the Asia-Pacific</i> . This pathogenic agent complies with the criteria described in the <i>WOAH Aquatic Animal Health Code Article 2.1.2. Hazard Identification</i> and will be retained for risk assessment. |
|-------------------------------------------------------------|---------------------------------------------------------------------------------------------------------------------------------------------------------------------------------------------------------------------------------------------------------------------------------------------------------------------------------------------------------------------------------|
